# Supplementary material for: Determination of carbon and oxygen isotopes of geological samples with a complicated matrix: comparison of different analytical methods
Source: Royal Society of Chemistry journal article supplement (doi:10.1039/c4ay01717j), 2014-01-01
Supplement: c4ay01717j1.pdf [file c4ay01717j1.pdf]

## Supporting material:

### 1. Methods

The content of organic carbon in geological samples was determined using a continuous-flow isotope ratio mass spectrometer (CF-IRMS). The CF-IRMS system consists of an EA (Flash 1112 series) coupled to a Finnigan MAT 253 mass spectrometer. The combustion temperature was set at 960°C, and the temperature of reduction tube was set at 680°C. Standard samples with known carbon contents (glycine:  $C_{wt}\%$  = 32%) were used to calibrate the measurement and to monitor the working conditions.

The carbonate percentage of geological samples was measured using GasBench II coupled to a Finnigan MAT 253 isotope ratio mass spectrometer. The geological samples were firstly weighed, carbonate contained in those samples then reacted with 103% phosphoric acid at 70°C to generate  $CO_2$  and the resulted  $CO_2$  was finally introduced to isotope ratio mass spectrometer for measurement. The area of first peak of sample  $CO_2$  ( $m/z=44$ ) was compared with that of pure carbonate standard to calculate the percentage of carbonate in geological samples.

### 2. Figures

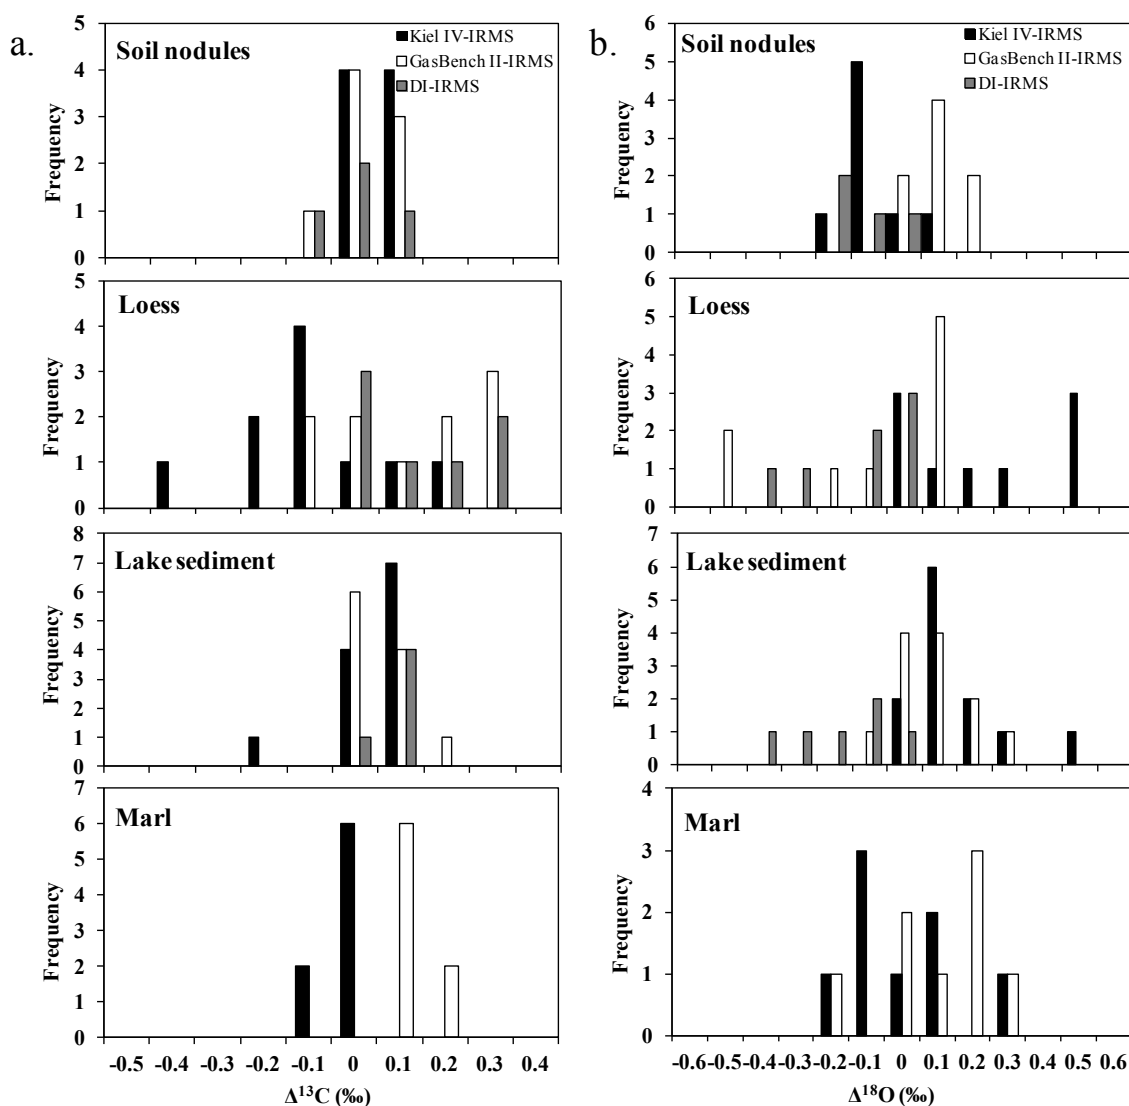

Fig. S1 A statistical diagram showing (a) differences in  $\delta^{13}C$  values ( $\Delta^{13}C$ ) and (b) differences in  $\delta^{18}O$  values ( $\Delta^{18}O$ ) measured using Kiel IV, GasBench II and dual inlet IRMS.

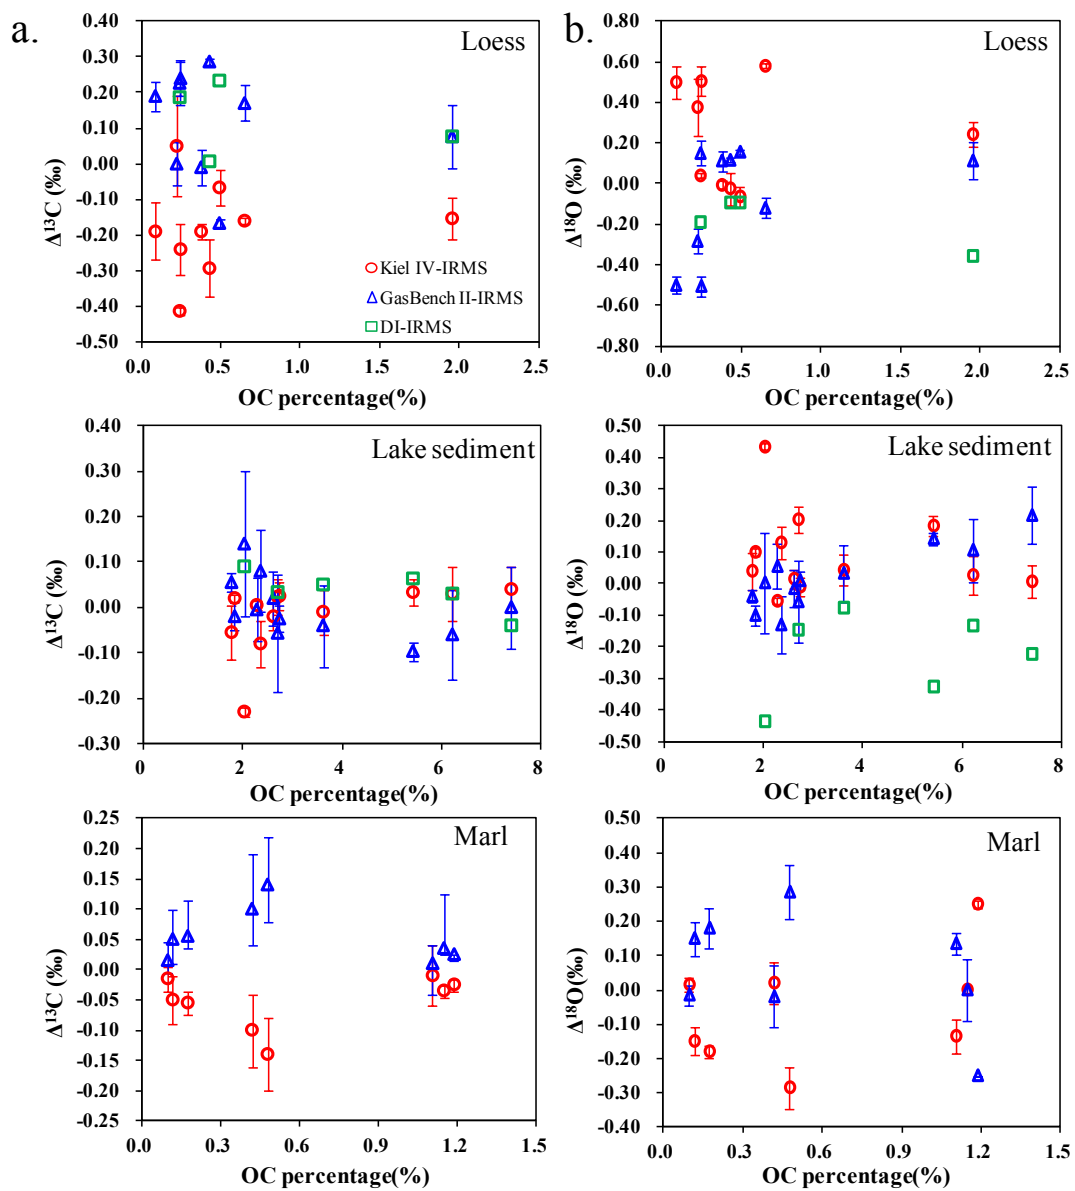

Fig. S2 Changes in  $\Delta^{13}\text{C}$  and  $\Delta^{18}\text{O}$  values of loess, lake sediment and marl along with organic carbon (OC) content.

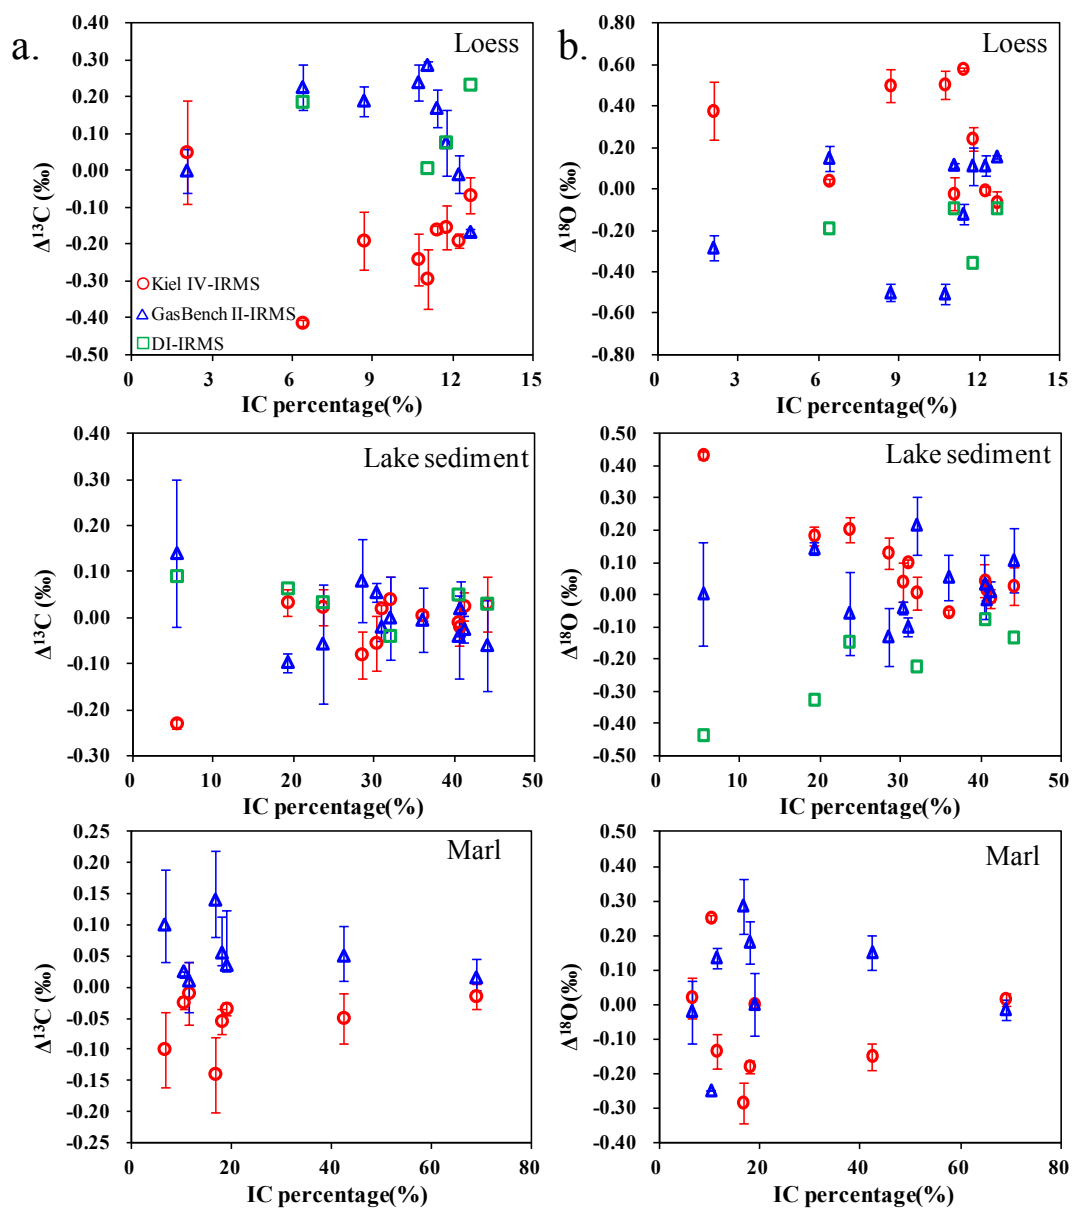

Fig. S3 Changes in  $\Delta^{13}\text{C}$  and  $\Delta^{18}\text{O}$  values of loess, lake sediment and marl along with carbonate (IC) percentage.

### 3. Table

Table S1 Contents of carbonate and organic carbon contained in carbonate nodules, loess, lake sediments and marl.

| Type              | Sample No. | Carbonate percentage (%) | Organic carbon content (%) |
|-------------------|------------|--------------------------|----------------------------|
| Carbonate nodules | HD02-1     | 73.59                    | -                          |
|                   | HD02-2     | 74.57                    | -                          |
|                   | HD02-3     | 86.43                    | -                          |
|                   | HDPE-205   | 28.46                    | -                          |
| Loess             | LT-L1      | 10.70                    | 0.25                       |
|                   | LT-L3      | 8.67                     | 0.09                       |
|                   | LP-3       | 11.73                    | 1.95                       |

|               |           |       |      |
|---------------|-----------|-------|------|
|               | LP-5      | 12.64 | 0.49 |
|               | LP-7      | 11.03 | 0.43 |
|               | LP-13     | 12.20 | 0.38 |
|               | LP-17     | 2.06  | 0.22 |
|               | LYX-S201  | 11.38 | 0.65 |
|               | TGL       | 6.38  | 0.24 |
|               | DH-281    | 28.44 | 2.35 |
|               | DH-491    | 40.65 | 2.61 |
|               | DH-495    | 41.18 | 2.73 |
|               | DH-537    | 35.97 | 2.27 |
|               | DH-539    | 30.25 | 1.77 |
| Lake sediment | DH-541    | 30.90 | 1.83 |
|               | XY3-1-06  | 19.25 | 5.42 |
|               | XY3-1-130 | 5.46  | 2.02 |
|               | XY3-2-40  | 23.59 | 2.70 |
|               | XY3-2-150 | 40.46 | 3.61 |
|               | XY3-3-15  | 44.03 | 6.21 |
|               | XY3-3-91  | 31.96 | 7.40 |
|               | B32-3     | 6.43  | 0.42 |
|               | B34-17    | 17.93 | 0.17 |
|               | B34-18    | 11.33 | 1.10 |
|               | B34-21    | 10.27 | 1.19 |
| Marl          | B34-27    | 68.84 | 0.10 |
|               | B34-36    | 18.88 | 1.15 |
|               | B34-37    | 42.33 | 0.12 |
|               | B34-38    | 16.61 | 0.48 |

Table S2  $\delta^{13}\text{C}$  and  $\delta^{18}\text{O}$  values of geological samples measured using Kiel IV-IRMS, GasBench II-IRMS and DI-IRMS.

| Type              | Sample No. | $\delta^{13}\text{C}$ |             |            | $\delta^{18}\text{O}$ |             |            |
|-------------------|------------|-----------------------|-------------|------------|-----------------------|-------------|------------|
|                   |            | Kiel IV               | GasBench II | Duel Inlet | Kiel IV               | GasBench II | Duel Inlet |
|                   | YAL-S0-C   | -5.72                 | -5.72       | -5.70      | -9.48                 | -9.16       | -9.48      |
|                   | YAL-S1-B   | -4.20                 | -4.27       | -4.01      | -8.61                 | -8.58       | -8.96      |
|                   | YAL-S2-2B  | -4.97                 | -4.98       | -5.06      | -8.82                 | -8.69       | -9.15      |
| Carbonate nodules | TJK-S15    | -8.14                 | -8.17       | -8.16      | -10.35                | -10.08      | -10.33     |
|                   | HD02-1     | -8.63±0.09            | -8.59±0.07  | -          | -7.10±0.02            | -6.63±0.10  | -          |
|                   | HD02-2     | -6.62±0.03            | -6.70±0.07  | -          | -7.15±0.05            | -6.94±0.14  | -          |
|                   | HD02-3     | -8.62±0.15            | -8.81±0.08  | -          | -7.00±0.01            | -6.84±0.08  | -          |
|                   | HDPE-205   | -8.03±0.06            | -7.93±0.09  | -          | -7.02±0.08            | -7.00±0.04  | -          |
|                   | LT-L1      | -5.98±0.07            | -5.50±0.05  | -          | -7.97±0.11            | -8.98±0.09  | -          |
|                   | LT-L3      | -4.98±0.08            | -4.60±0.04  | -          | -8.36±0.04            | -9.36±0.09  | -          |
| Loess             | LP-3       | -5.41±0.06            | -5.18±0.09  | -5.18      | -8.54±0.12            | -8.67±0.03  | -9.14      |
|                   | LP-5       | -2.79±0.05            | -2.89±0.01  | -2.49      | -8.51±0.02            | -8.29±0.13  | -8.54      |
|                   | LP-7       | -4.96±0.08            | -4.38±0.01  | -4.66      | -8.80±0.15            | -8.66±0.06  | -8.87      |

|          |           |            |            |       |             |             |        |
|----------|-----------|------------|------------|-------|-------------|-------------|--------|
|          | LP-13     | -3.61±0.02 | -3.43±0.05 | -3.22 | -7.96±0.13  | -7.84±0.04  | -8.06  |
|          | LP-17     | -2.74±0.14 | -2.79±0.06 | -2.84 | -8.42±0.10  | -9.08±0.17  | -8.89  |
|          | LYX-S201  | -3.80±0.01 | -3.47±0.05 | -3.65 | -6.90±0.10  | -7.60±0.05  | -7.94  |
|          | TGL       | -2.27±0.01 | -1.63±0.06 | -1.67 | -9.48±0.11  | -9.37±0.31  | -9.71  |
|          | DH-281    | -2.47±0.05 | -2.31±0.09 | -     | -1.90±0.09  | -2.16±0.14  | -      |
|          | DH-491    | 1.16±0.03  | 1.20±0.06  | -     | -5.88±0.03  | -5.91±0.08  | -      |
|          | DH-495    | 0.53±0.03  | 0.48±0.03  | -     | -7.06±0.11  | -7.04±0.05  | -      |
|          | DH-537    | 0.07±0.01  | 0.06±0.07  | -     | -4.82±0.04  | -4.71±0.04  | -      |
|          | DH-539    | -0.99±0.06 | -0.88±0.02 | -     | -4.61±0.02  | -4.69±0.09  | -      |
| Lake     | DH-541    | -1.42±0.01 | -1.46±0.03 | -     | -4.27±0.01  | -4.47±0.02  | -      |
| sediment | XY3-1-06  | 0.94±0.03  | 0.81±0.02  | 0.97  | -5.72±0.07  | -5.76±0.38  | -6.23  |
|          | XY3-1-130 | -0.31±0.01 | 0.06±0.16  | 0.01  | -6.33±0.12  | -6.76±0.23  | -7.20  |
|          | XY3-2-40  | -0.33±0.04 | -0.41±0.13 | -0.32 | -6.62±0.06  | -6.88±0.23  | -6.97  |
|          | XY3-2-150 | -1.31±0.05 | -1.34±0.09 | -1.25 | -7.66±0.14  | -7.67±0.20  | -7.78  |
|          | XY3-3-15  | 0.52±0.06  | 0.43±0.10  | 0.52  | -8.14±0.11  | -8.06±0.14  | -8.30  |
|          | XY3-3-91  | 0.78±0.05  | 0.74±0.09  | 0.70  | -10.65±0.14 | -10.44±0.15 | -10.88 |
|          | B32-3     | -0.38±0.06 | -0.18±0.09 | -     | -8.53±0.02  | -8.57±0.02  | -      |
|          | B34-17    | -0.64±0.02 | -0.53±0.06 | -     | -6.67±0.09  | -6.31±0.11  | -      |
|          | B34-18    | -0.63±0.05 | -0.61±0.03 | -     | -7.87±0.09  | -7.60±0.07  | -      |
|          | B34-21    | -0.46±0.01 | -0.41±0.00 | -     | -7.21±0.06  | -7.71±0.09  | -      |
| Marl     | B34-27    | 0.73±0.02  | 0.76±0.03  | -     | -6.23±0.10  | -6.26±0.05  | -      |
|          | B34-36    | 0.06±0.01  | 0.13±0.09  | -     | -6.72±0.03  | -6.72±0.11  | -      |
|          | B34-37    | 0.51±0.04  | 0.61±0.05  | -     | -6.23±0.01  | -5.93±0.05  | -      |
|          | B34-38    | 0.74±0.06  | 1.02±0.08  | -     | -6.65±0.07  | -6.08±0.13  | -      |
